# Supplementary material for: Atom transfer radical-polymerized cationic shells on gold nanoparticles for near infrared-triggered photodynamic therapy of tumor-bearing animals
Source: Royal Society of Chemistry journal article supplement (doi:10.1039/d1tb02004h), 2021-01-01
Supplement: d1tb02004h1.pdf [file d1tb02004h1.pdf]

Supplemental Information

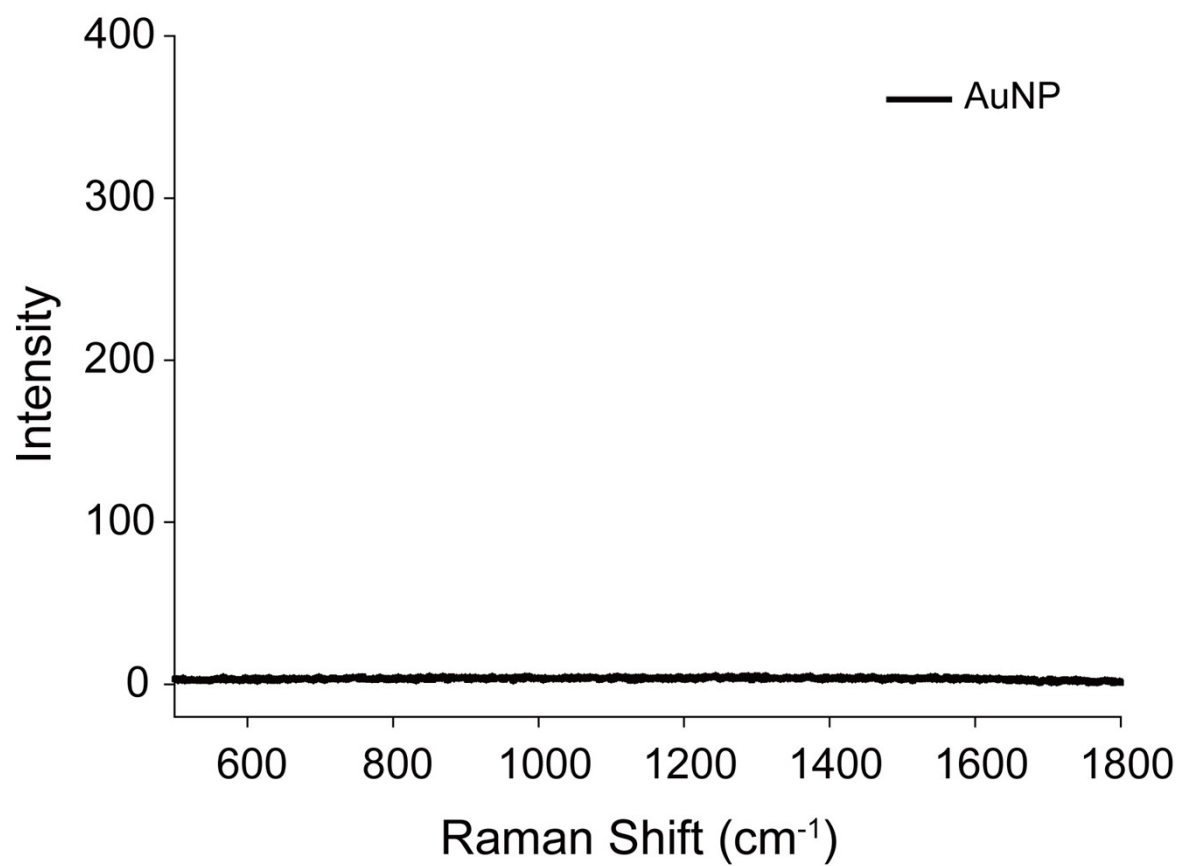

**Figure S1.** Raman spectrum of AuNP.

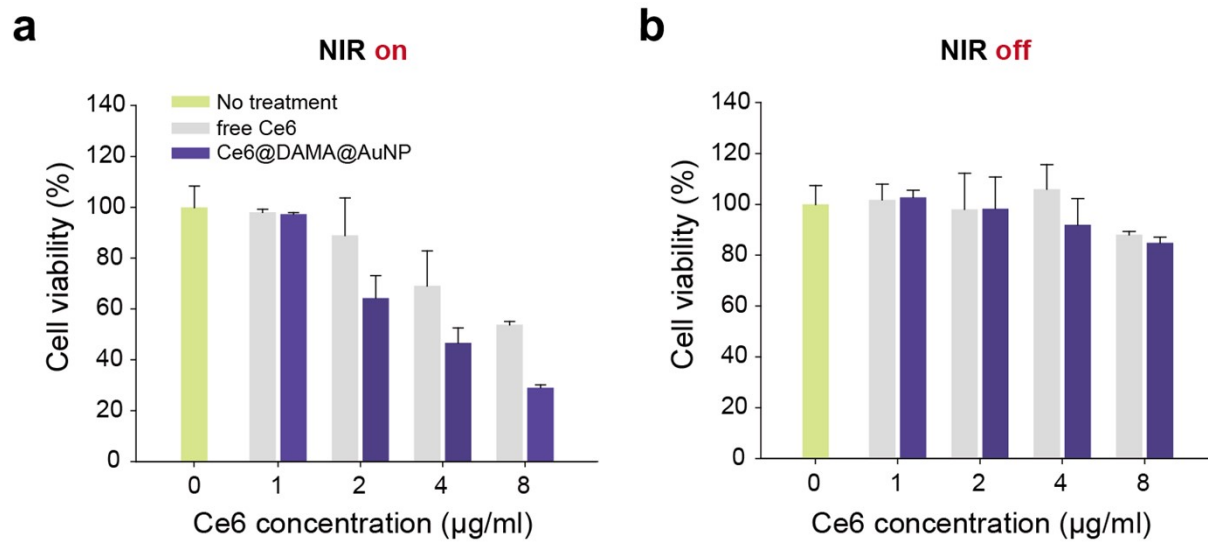

**Figure S2.** Cell viability (a) without and (b) with 660 nm laser irradiation ( $50\text{mW/cm}^2$ ) for 2 min at different concentration of Ce6.

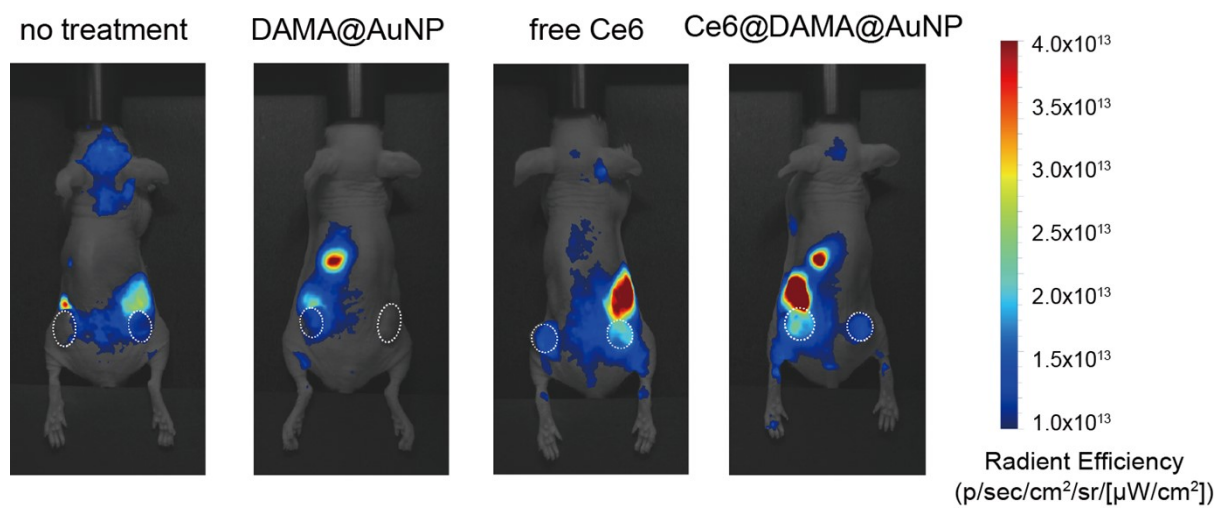

**Figure S3.** In vivo fluorescence images of A549 tumor-bearing mice treated with no treatment, DAMA@AuNPs, free Ce6, and Ce6@DAMA@AuNPs after 9 h post injection.
